# Supplementary material for: Glucose transporter GLUT1 expression and clinical outcome in solid tumors: a systematic review and meta-analysis
Source: PubMed Central journal article supplement (PMC5370007; doi:10.18632/oncotarget.15171), 2017-02-07
Supplement: oncotarget-08-16875-s001.pdf [file oncotarget-08-16875-s001.pdf]

# Glucose transporter GLUT1 expression and clinical outcome in solid tumors: a systematic review and meta-analysis

## Supplementary Materials

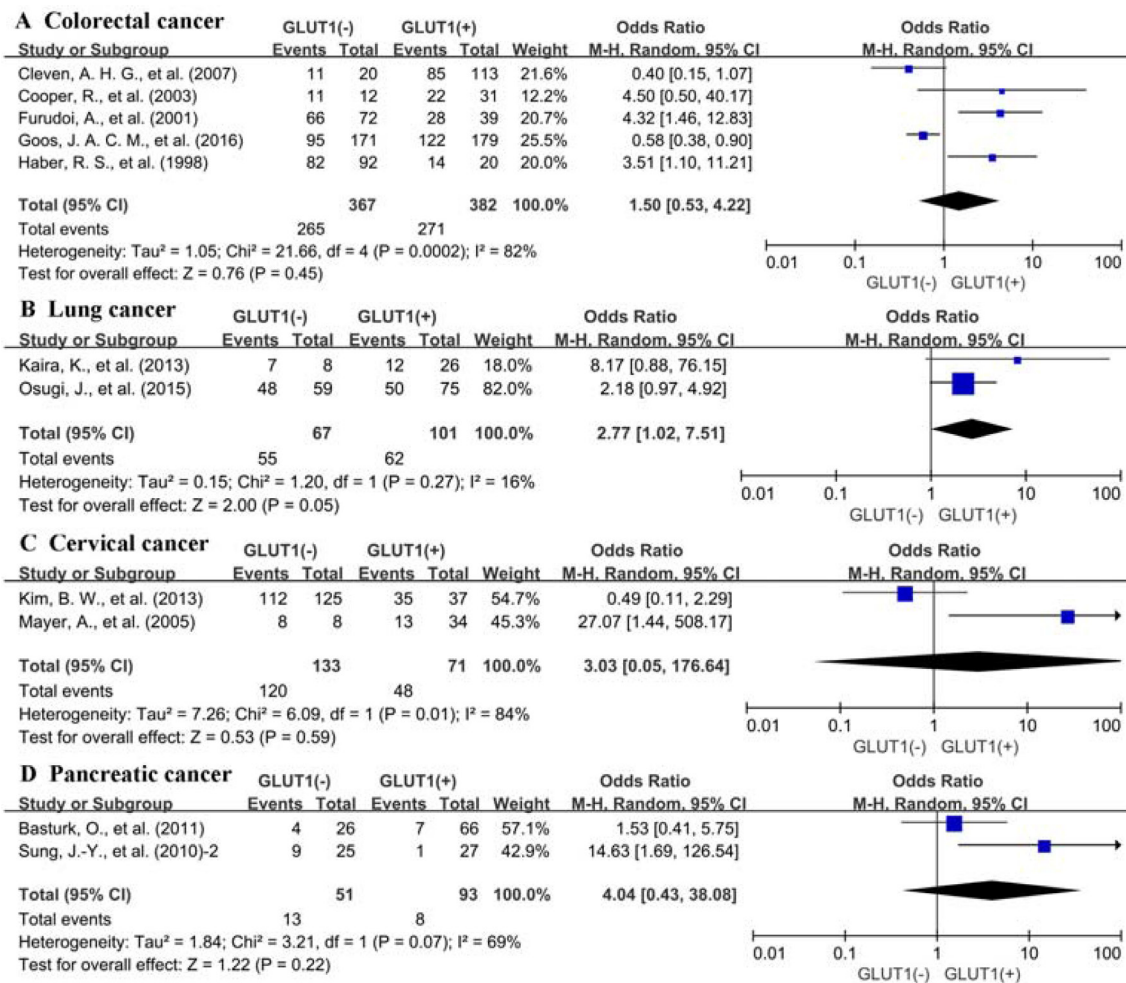

Supplementary Figure 1: Subgroup analysis of 3-year OS by GLUT1 expression in different tumor types. (A) colorectal cancer; (B) lung cancer; (C) cervical cancer; (D) pancreatic cancer.

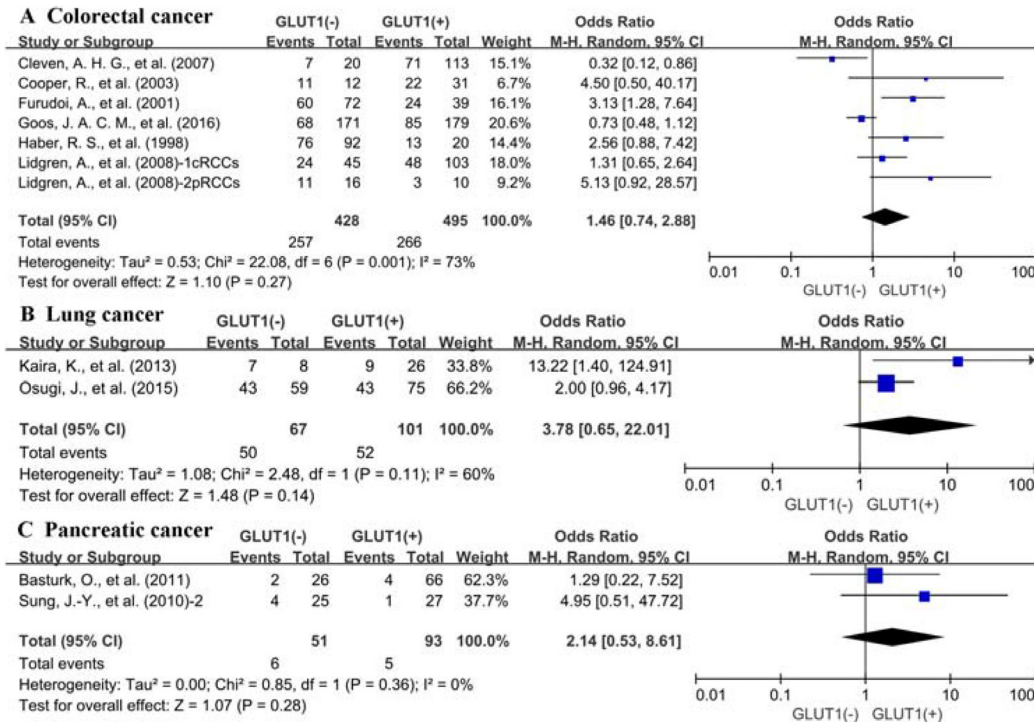

Supplementary Figure 2: Subgroup analysis of 5-year OS by GLUT1 expression in different tumor types. (A) colorectal cancer; (B) lung cancer; (C) pancreatic cancer.

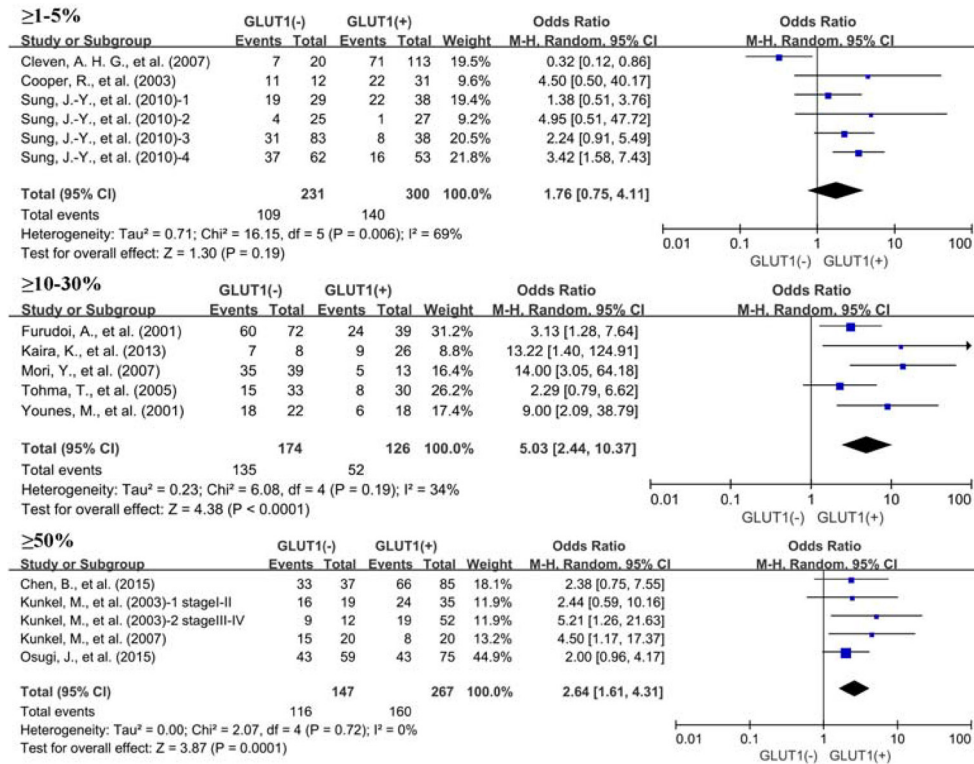

Supplementary Figure 3: Subgroup analysis of the correlation between GLUT1 overexpression and 5-year OS of solid tumors according to cut-off values determining GLUT1 positivity.

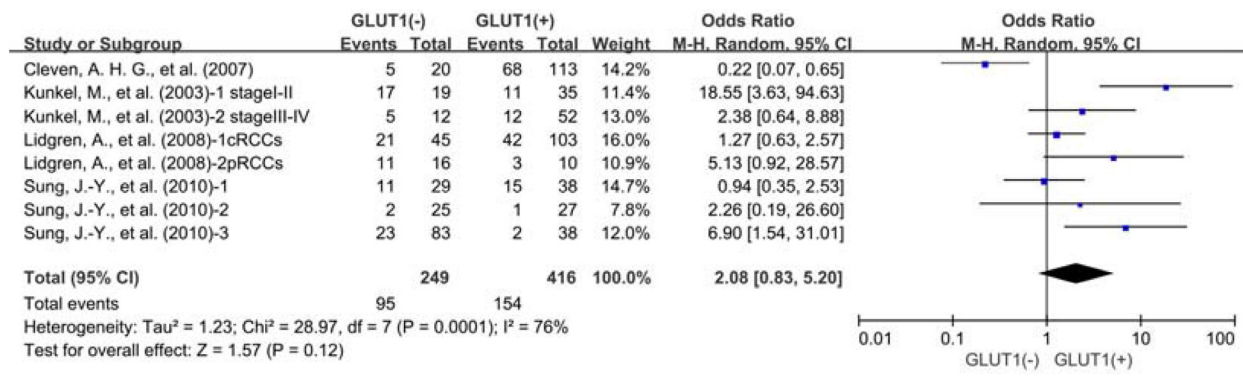

Supplementary Figure 4: 10-year OS by GLUT1 expression.

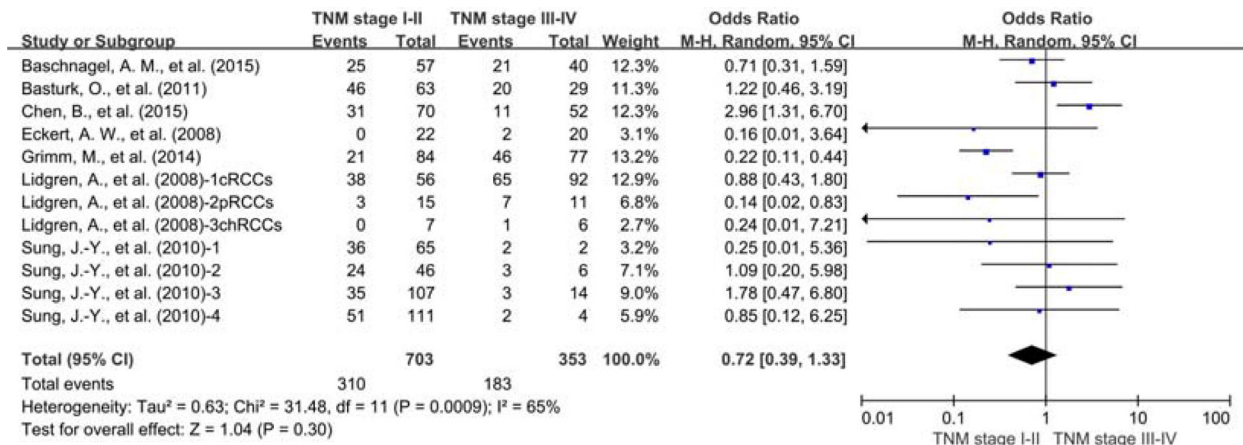

Supplementary Figure 5: Subgroup analysis of the correlation between GLUT1 expression and tumor stage.

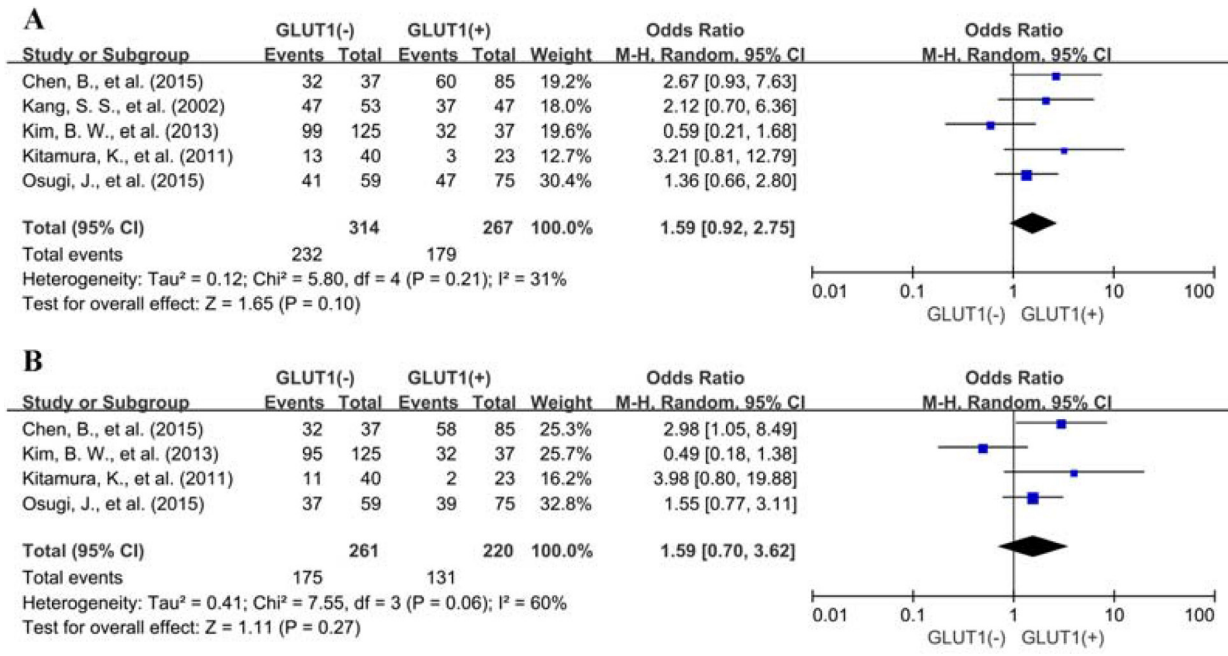

**Supplementary Figure 6: Subgroup analysis of association between GLUT1 overexpression and 3-year DFS. (A) and 5-year DFS (B) in Asian countries.**

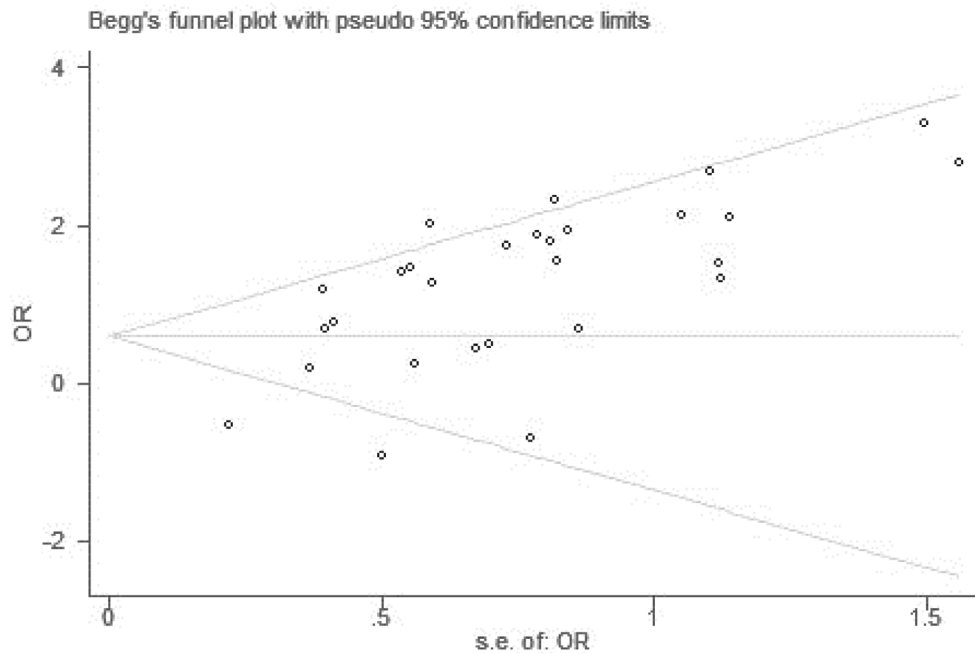

**Supplementary Figure 7: Assessment of publication bias using Begg's funnel plot analysis of studies on 3-year OS.**

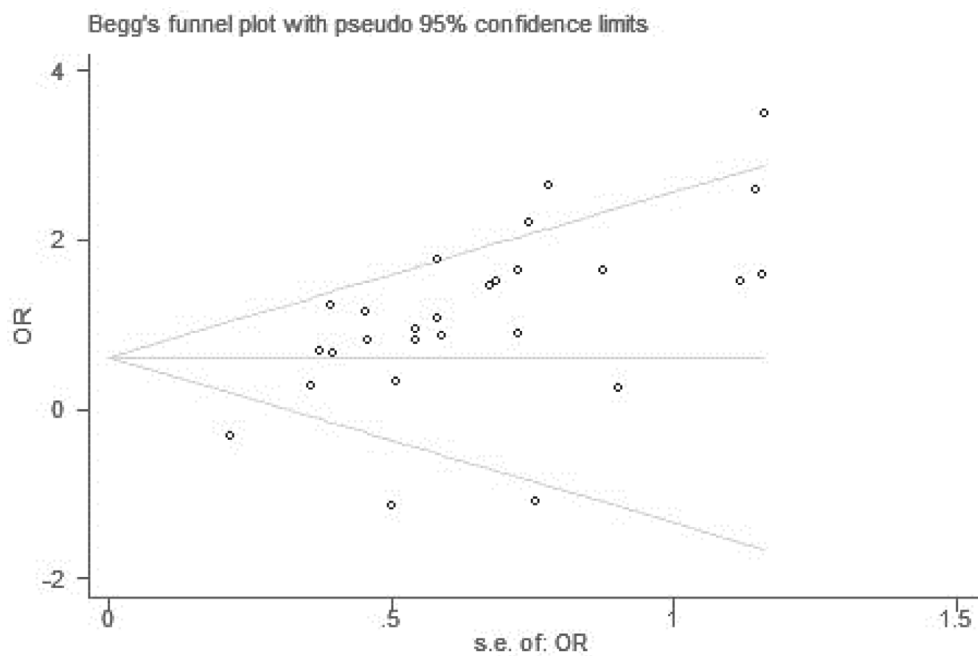

Supplementary Figure 8: Assessment of publication bias using Begg's funnel plot analysis of studies on 5-year OS.

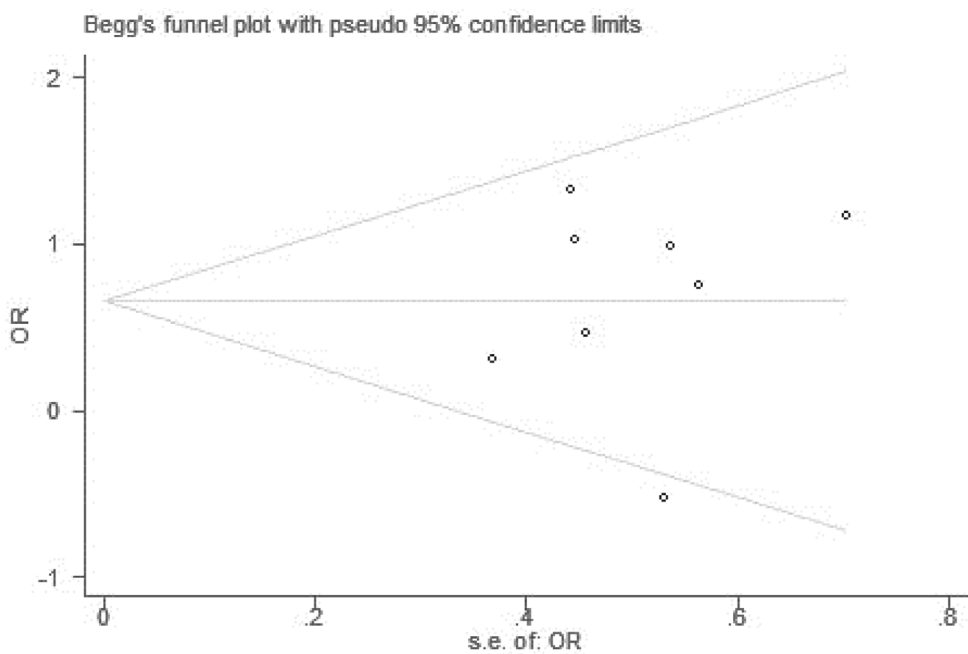

Supplementary Figure 9: Assessment of publication bias using Begg's funnel plot analysis of studies on 3-year DFS.

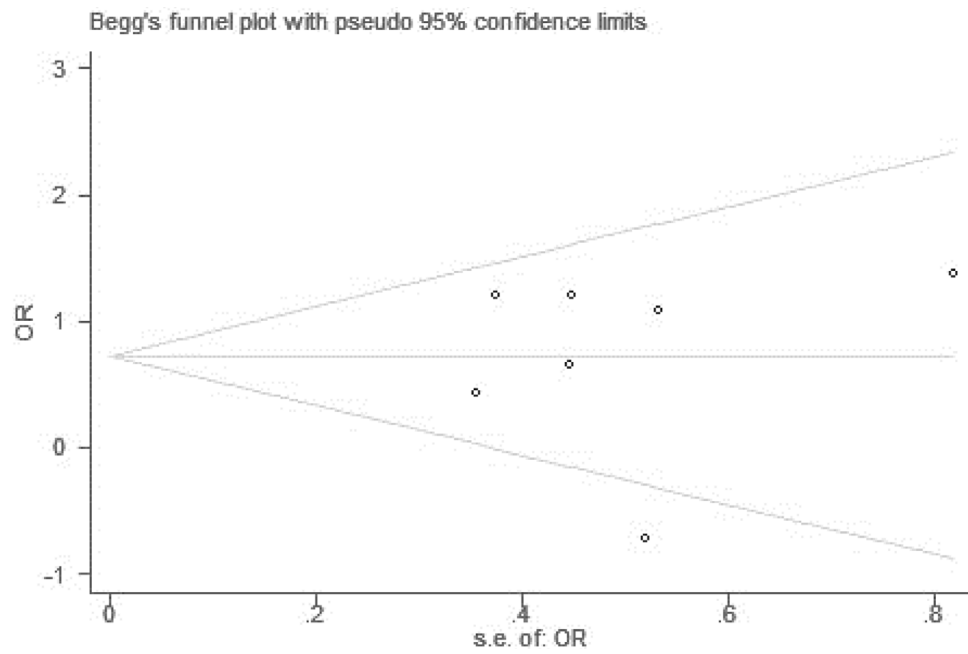

Supplementary Figure 10: Assessment of publication bias using Begg's funnel plot analysis of studies on 5-year DFS.
